# Supplementary material for: An unusual lamellar framework constructed from a tetracarboxylatocalix[4]arene with highly efficient metal-ion exchange
Source: Royal Society of Chemistry journal article supplement (doi:10.1039/c4ce01463d), 2014-09-08
Supplement: c4ce01463d1.pdf [file c4ce01463d1.pdf]

## Electronic supplementary information

**An unusual lamellar framework constructed from a tetracarboxylatocalix[4]arene that presents highly efficient metal-ion exchange**

**Table S1a** Selected bond distances (Å) and angles (deg) for **1**.

|                                                |            |                                               |            |
|------------------------------------------------|------------|-----------------------------------------------|------------|
| Zn(1)-O(4) <sup>#1</sup>                       | 1.994(2)   | Zn(1)-O(1)                                    | 2.039(3)   |
| Zn(1)-O(17) <sup>#2</sup>                      | 2.051(2)   | Zn(1)-O(5) <sup>#3</sup>                      | 2.054(2)   |
| Zn(1)-O(17) <sup>#1</sup>                      | 2.122(2)   | Zn(2)-O(17)                                   | 1.944(2)   |
| Zn(2)-O(6) <sup>#4</sup>                       | 1.962(2)   | Zn(2)-O(7) <sup>#1</sup>                      | 1.980(3)   |
| Zn(2)-O(3)                                     | 1.991(2)   | Zn(2)-O(8) <sup>#1</sup>                      | 2.410(3)   |
| O(4) <sup>#1</sup> -Zn(1)-O(1)                 | 101.81(11) | O(4) <sup>#1</sup> -Zn(1)-O(17) <sup>#2</sup> | 102.77(10) |
| O(1)-Zn(1)-O(17) <sup>#2</sup>                 | 154.52(10) | O(4) <sup>#1</sup> -Zn(1)-O(5) <sup>#3</sup>  | 94.17(9)   |
| O(1)-Zn(1)-O(5) <sup>#3</sup>                  | 91.53(10)  | O(17) <sup>#2</sup> -Zn(1)-O(5) <sup>#3</sup> | 93.30(9)   |
| O(4) <sup>#1</sup> -Zn(1)-O(17) <sup>#1</sup>  | 99.37(9)   | O(1)-Zn(1)-O(17) <sup>#1</sup>                | 90.20(10)  |
| O(17) <sup>#2</sup> -Zn(1)-O(17) <sup>#1</sup> | 79.28(9)   | O(5) <sup>#3</sup> -Zn(1)-O(17) <sup>#1</sup> | 165.70(9)  |
| O(17)-Zn(2)-O(6) <sup>#4</sup>                 | 106.87(9)  | O(17)-Zn(2)-O(7) <sup>#1</sup>                | 128.09(11) |
| O(6) <sup>#4</sup> -Zn(2)-O(7) <sup>#1</sup>   | 112.64(11) | O(17)-Zn(2)-O(3)                              | 101.52(9)  |
| O(6) <sup>#4</sup> -Zn(2)-O(3)                 | 100.17(9)  | O(7) <sup>#1</sup> -Zn(2)-O(3)                | 103.14(10) |
| O(17)-Zn(2)-O(8) <sup>#1</sup>                 | 89.32(10)  | O(6) <sup>#4</sup> -Zn(2)-O(8) <sup>#1</sup>  | 91.94(12)  |
| O(7) <sup>#1</sup> -Zn(2)-O(8) <sup>#1</sup>   | 57.80(10)  | O(3)-Zn(2)-O(8) <sup>#1</sup>                 | 160.52(10) |

**Table S1b** Hydrogen bonds for **1** (Å and °).

| D-H...A                          | d(D-H)    | d(H...A) | d(D...A) | <(DHA) |
|----------------------------------|-----------|----------|----------|--------|
| O(17)-H(1A)...O(2) <sup>#1</sup> | 0.826(19) | 2.56(4)  | 2.987(3) | 113(3) |
| N(1)-H(1B)...O(12) <sup>#2</sup> | 0.851(19) | 2.22(3)  | 2.969(4) | 146(4) |
| N(1)-H(1C)...O(2)                | 0.872(19) | 1.86(2)  | 2.720(4) | 169(5) |

Symmetry transformations used to generate equivalent atoms: <sup>#1</sup> -x+2, -y+1, -z+1; <sup>#2</sup> x, y+1, z; <sup>#3</sup> x+1, y+1, z; <sup>#4</sup> x+1, y, z.

**Table S2a** Selected bond distances (Å) and angles (deg) for **2**.

|                          |          |                          |          |
|--------------------------|----------|--------------------------|----------|
| Zn(1)-O(6) <sup>#1</sup> | 1.962(3) | Zn(1)-O(2)               | 1.999(3) |
| Zn(1)-O(1W)              | 2.008(3) | Zn(1)-O(3) <sup>#2</sup> | 2.032(4) |

|                                |            |                                              |            |
|--------------------------------|------------|----------------------------------------------|------------|
| O(6) <sup>#1</sup> -Zn(1)-O(2) | 120.08(13) | O(6) <sup>#1</sup> -Zn(1)-O(1W)              | 106.63(14) |
| O(2)-Zn(1)-O(1W)               | 101.45(14) | O(6) <sup>#1</sup> -Zn(1)-O(3) <sup>#2</sup> | 131.05(17) |
| O(2)-Zn(1)-O(3) <sup>#2</sup>  | 95.58(16)  | O(1W)-Zn(1)-O(3) <sup>#2</sup>               | 96.65(14)  |

**Table S2b** Hydrogen bonds for **2** (Å and °).

| D-H···A                          | d(D-H)    | d(H···A)  | d(D···A) | <(DHA) |
|----------------------------------|-----------|-----------|----------|--------|
| O(1W)-H(1A)...O(2) <sup>#4</sup> | 0.834(19) | 2.23(3)   | 2.763(5) | 122(3) |
| O(1W)-H(1B)...O(6W)              | 0.873(19) | 1.83(2)   | 2.699(5) | 170(6) |
| N(1)-H(1C)...O(3W)               | 0.873(10) | 1.84(3)   | 2.641(8) | 152(5) |
| N(1)-H(1F)...O(1)                | 0.859(10) | 2.08(3)   | 2.891(6) | 157(6) |
| N(2)-H(2A)...O(7) <sup>#5</sup>  | 0.853(9)  | 2.42(5)   | 2.953(6) | 122(4) |
| N(2)-H(2B)...O(2W)               | 0.853(9)  | 1.941(12) | 2.791(6) | 174(4) |
| N(2)-H(2D)...O(1) <sup>#5</sup>  | 0.852(10) | 2.39(5)   | 2.952(6) | 124(5) |

Symmetry transformations used to generate equivalent atoms: <sup>#1</sup> x, y+1, z; <sup>#2</sup> -x+1, -y+1, -z; <sup>#3</sup> x, y-1, z; <sup>#4</sup> -x+1, -y+2, -z; <sup>#5</sup> -x+2, -y+1, -z.

**Table S3a** Selected bond distances (Å) and angles (deg) for **3**.

|                                              |          |                                              |          |
|----------------------------------------------|----------|----------------------------------------------|----------|
| Cd(1)-O(5) <sup>#1</sup>                     | 2.236(7) | Cd(1)-O(6) <sup>#2</sup>                     | 2.250(6) |
| Cd(1)-O(3)                                   | 2.288(6) | Cd(1)-O(4) <sup>#3</sup>                     | 2.323(5) |
| Cd(1)-O(7) <sup>#4</sup>                     | 2.402(6) | Cd(1)-O(8) <sup>#4</sup>                     | 2.434(7) |
| Cd(2)-O(1)                                   | 2.148(8) | Cd(2)-O(1W)                                  | 2.247(7) |
| Cd(2)-O(9)                                   | 2.286(9) | Cd(2)-O(7) <sup>#1</sup>                     | 2.322(6) |
| Cd(2)-O(10)                                  | 2.334(8) | Cd(2)-O(18) <sup>#1</sup>                    | 2.418(5) |
| O(5) <sup>#1</sup> -Cd(1)-O(6) <sup>#2</sup> | 147.9(3) | O(5) <sup>#1</sup> -Cd(1)-O(3)               | 84.7(2)  |
| O(6) <sup>#2</sup> -Cd(1)-O(3)               | 84.3(2)  | O(5) <sup>#1</sup> -Cd(1)-O(4) <sup>#3</sup> | 87.7(2)  |
| O(6) <sup>#2</sup> -Cd(1)-O(4) <sup>#3</sup> | 86.4(2)  | O(3)-Cd(1)-O(4) <sup>#3</sup>                | 149.0(2) |
| O(5) <sup>#1</sup> -Cd(1)-O(7) <sup>#4</sup> | 109.9(3) | O(6) <sup>#2</sup> -Cd(1)-O(7) <sup>#4</sup> | 100.4(2) |
| O(3)-Cd(1)-O(7) <sup>#4</sup>                | 129.4(2) | O(4) <sup>#3</sup> -Cd(1)-O(7) <sup>#4</sup> | 81.4(2)  |
| O(5) <sup>#1</sup> -Cd(1)-O(8) <sup>#4</sup> | 94.6(3)  | O(6) <sup>#2</sup> -Cd(1)-O(8) <sup>#4</sup> | 112.5(3) |
| O(3)-Cd(1)-O(8) <sup>#4</sup>                | 78.5(2)  | O(4) <sup>#3</sup> -Cd(1)-O(8) <sup>#4</sup> | 132.1(2) |
| O(7) <sup>#4</sup> -Cd(1)-O(8) <sup>#4</sup> | 52.9(2)  | O(1)-Cd(2)-O(1W)                             | 119.1(3) |
| O(1)-Cd(2)-O(9)                              | 83.9(3)  | O(1W)-Cd(2)-O(9)                             | 94.6(3)  |
| O(1)-Cd(2)-O(7) <sup>#1</sup>                | 151.6(3) | O(1W)-Cd(2)-O(7) <sup>#1</sup>               | 86.6(2)  |
| O(9)-Cd(2)-O(7) <sup>#1</sup>                | 81.9(3)  | O(1)-Cd(2)-O(10)                             | 110.8(3) |
| O(1W)-Cd(2)-O(10)                            | 85.1(3)  | O(9)-Cd(2)-O(10)                             | 163.3(3) |
| O(7) <sup>#1</sup> -Cd(2)-O(10)              | 81.4(3)  | O(1)-Cd(2)-O(18) <sup>#1</sup>               | 88.6(3)  |
| O(1W)-Cd(2)-O(18) <sup>#1</sup>              | 152.0(2) | O(9)-Cd(2)-O(18) <sup>#1</sup>               | 91.7(3)  |

|                                               |         |                                 |         |
|-----------------------------------------------|---------|---------------------------------|---------|
| O(7) <sup>#1</sup> -Cd(2)-O(18) <sup>#1</sup> | 67.4(2) | O(10)-Cd(2)-O(18) <sup>#1</sup> | 81.1(2) |
|-----------------------------------------------|---------|---------------------------------|---------|

**Table S3b** Hydrogen bonds for **3** (Å and °).

| D-H...A                           | d(D-H)  | d(H...A) | d(D...A) | <(DHA)  |
|-----------------------------------|---------|----------|----------|---------|
| O(1W)-H(1B)...O(15) <sup>#5</sup> | 0.88(2) | 1.98(5)  | 2.785(8) | 153(10) |
| O(1W)-H(1A)...O(4) <sup>#5</sup>  | 0.88(2) | 1.89(6)  | 2.675(9) | 148(10) |

Symmetry transformations used to generate equivalent atoms: <sup>#1</sup> x-1, y, z; <sup>#2</sup> -x+2, -y, -z+1; <sup>#3</sup> -x+1, -y, -z+1; <sup>#4</sup> -x+1, -y+1, -z+1; <sup>#5</sup> x-1, y+1, z.

**Fig. S1** The coordination environment of tetranuclear Zn(II) cluster in **1**.

**Fig. S2** The coordination environment of tetranuclear Cd(II) cluster in **3**.

**Fig. S3** PXRD patterns for the simulated (black) and experimental (blue) of **2** and **3** (the patterns suggest the phase purity since the experimental data dovetail well with the simulative ones).

**Fig. S4** The amplifying photographs of **1** (left) and Cu<sup>2+</sup>-exchanged sample **1a** (right).

We can only obtain the cell parameters of **1a** because of the efflorescence of the samples. Nevertheless, by comparing the data, we can see that the cell parameters of **1a** were similar with those of **1**.

The cell parameters of **1**:  $a = 12.2409(6) \text{ \AA}$ ,  $b = 13.5072(7) \text{ \AA}$ ,  $c = 20.2897(14) \text{ \AA}$ ,  $\alpha = 103.942(10)^\circ$ ,  $\beta = 100.864(8)^\circ$ ,  $\gamma = 93.222(5)^\circ$ ,  $V = 3179.3(3) \text{ \AA}^3$ .

The cell parameters of **1a**:  $a = 12.2528(10) \text{ \AA}$ ,  $b = 13.4684(12) \text{ \AA}$ ,  $c = 20.2323(19) \text{ \AA}$ ,  $\alpha = 103.888(8)^\circ$ ,  $\beta = 100.909(7)^\circ$ ,  $\gamma = 93.292(7)^\circ$ ,  $V = 3164.1(5) \text{ \AA}^3$ .

**Fig. S5** Luminescence decay curves for H<sub>4</sub>TCC4A and compounds **1-3** (the black circles represent experimental data, and the solid red lines represent fitting results).
